# Supplementary material
Source: HighWire-hosted journal article supplement (https://jnm.snmjournals.org/highwire/filestream/99791/field_highwire_adjunct_files/0/238923_Supplemental_Data.pdf)
Supplement: 238923_Supplemental_Data.pdf [file 238923_Supplemental_Data.pdf]

Supplemental Tables 1A –C: Success and failure rates for subgroups (for online publication only)

Table 1A; Success and failure rates for subgroups uptake time 60 versus 90 minutes

Uptake time 60 min (HOVON)

|        | PASS | FAIL | EDIT | TOTAL |
|--------|------|------|------|-------|
| 41%    | 46   | 15   | 8    | 69    |
| A50    | 41   | 26   | 2    | 69    |
| SUV2.5 | 23   | 34   | 12   | 69    |
| SUV4.0 | 53   | 2    | 14   | 69    |
| MV2    | 53   | 2    | 14   | 69    |
| MV3    | 51   | 13   | 5    | 69    |

Uptake time 90 min (UK scans)

|        | PASS | FAIL | EDIT | TOTAL |
|--------|------|------|------|-------|
| 41%    | 36   | 30   | 3    | 69    |
| A50    | 34   | 31   | 4    | 69    |
| SUV2.5 | 28   | 23   | 18   | 69    |
| SUV4.0 | 52   | 4    | 13   | 69    |
| MV2    | 49   | 8    | 12   | 69    |
| MV3    | 39   | 27   | 3    | 69    |

|        | $\chi^2$ | df | P-value |
|--------|----------|----|---------|
| 41%    | 8.49     | 2  | 0.014   |
| A50P   | 1.76     | 2  | 0.415   |
| SUV2.5 | 3.81     | 2  | 0.149   |
| SUV4.0 | 0.71     | 2  | 0.701   |
| MV2    | 3.91     | 2  | 0.147   |
| MV3    | 7.00     | 2  | 0.030   |

For 41%max and MV3 there were less PASS and more FAIL for the uptake time 90 min (UK scans)

Table 1B: Success and failure rates for subgroups EARL compatible or not.

Not EARL compatible

|        | PASS | FAIL | EDITING | TOTAL |
|--------|------|------|---------|-------|
| 41%    | 42   | 24   | 5       | 71    |
| A50    | 37   | 30   | 4       | 71    |
| SUV2.5 | 23   | 34   | 14      | 71    |
| SUV4.0 | 58   | 2    | 11      | 71    |
| MV2    | 55   | 5    | 11      | 71    |
| MV3    | 49   | 19   | 3       | 71    |

EARL compatible

|        | PASS | FAIL | EDITING | TOTAL |
|--------|------|------|---------|-------|
| 41%    | 40   | 21   | 6       | 67    |
| A50    | 38   | 27   | 2       | 67    |
| SUV2.5 | 28   | 23   | 16      | 67    |
| SUV4.0 | 47   | 4    | 16      | 67    |
| MV2    | 47   | 5    | 15      | 67    |
| MV3    | 41   | 21   | 5       | 67    |

|        | $\chi^2$ | df | P-value |
|--------|----------|----|---------|
| 41%    | 0.22     | 2  | 0.896   |
| A50    | 0.72     | 2  | 0.698   |
| SUV2.5 | 2.63     | 2  | 0.269   |
| SUV4.0 | 2.72     | 2  | 0.295   |
| MV2    | 1.13     | 2  | 0.568   |
| MV3    | 1.20     | 2  | 0.549   |

No statistically significant differences between non-EARL and EARL compatible.

Table 1C: Success and failure rates for subgroups progression or not

No progression

|        | PASS | FAIL | EDITING | TOTAL |
|--------|------|------|---------|-------|
| 41%    | 45   | 18   | 6       | 69    |
| A50    | 43   | 23   | 3       | 69    |
| SUV2.5 | 26   | 28   | 15      | 69    |
| SUV4.0 | 51   | 4    | 14      | 69    |
| MV2    | 51   | 5    | 13      | 69    |
| MV3    | 50   | 16   | 3       | 69    |

Progression

|        | PASS | FAIL | EDITING | TOTAL |
|--------|------|------|---------|-------|
| 41%    | 37   | 27   | 5       | 69    |
| A50    | 32   | 34   | 3       | 69    |
| SUV2.5 | 25   | 29   | 15      | 69    |
| SUV4.0 | 54   | 2    | 13      | 69    |
| MV2    | 51   | 5    | 13      | 69    |
| MV3    | 40   | 24   | 5       | 69    |

|        | $\chi^2$ | df | P-value |
|--------|----------|----|---------|
| 41%    | 2.67     | 2  | 0.263   |
| A50    | 3.74     | 2  | 0.154   |
| SUV2.5 | 0.04     | 2  | 0.980   |
| SUV4.0 | 0.79     | 2  | 0.674   |
| MV2    | 0.00     | 2  | 1.000   |
| MV3    | 3.21     | 2  | 0.200   |

No statistically significant differences in the 'progression' group.

Supplemental Tables 2A -C (for publication online only)

Table 2A: Comparison of volumes (using transformed data) between scans performed at 60 min and 90 min

|        | Uptake time | N* | Mean | Std.Dev. | P-value |
|--------|-------------|----|------|----------|---------|
| SUV2.5 | 60 min      | 69 | 6.47 | 1.33     | 0.847   |
|        | 90 min      | 69 | 6.43 | 1.38     |         |
| SUV4.0 | 60 min      | 68 | 5.54 | 1.42     | 0.848   |
|        | 90 min      | 68 | 5.59 | 1.66     |         |
| A50P   | 60 min      | 68 | 4.61 | 1.57     | 0.449   |
|        | 90 min      | 68 | 4.40 | 1.67     |         |
| 41%    | 60 min      | 68 | 4.73 | 1.47     | 0.999   |
|        | 90 min      | 68 | 4.73 | 1.97     |         |
| MV2    | 60 min      | 68 | 5.56 | 1.40     | 0.481   |
|        | 90 min      | 68 | 5.75 | 1.69     |         |
| MV3    | 60 min      | 68 | 4.69 | 1.28     | 0.813   |
|        | 90 min      | 68 | 4.62 | 1.80     |         |

\*N= 136 for all methods except SUV2.5. In two scans SUV2.5 method identified a small MTV value where the other methods had a MTV value of 0. A value of 0 cannot be natural log-transformed.

Table 2B: Comparison of volumes (using transformed data) between scans that were compliant or non-compliant with standardized scanning recommendations

|        | EARL reconstruction | N* | Mean | Std.Dev. | P-value |
|--------|---------------------|----|------|----------|---------|
| SUV2.5 | Non-compliant       | 71 | 6.63 | 1.26     | 0.110   |
|        | Compliant           | 67 | 6.26 | 1.41     |         |
| SUV4.0 | Non-compliant       | 70 | 5.54 | 1.60     | 0.891   |
|        | Compliant           | 66 | 5.58 | 1.48     |         |
| A50P   | Non-compliant       | 70 | 4.53 | 1.65     | 0.816   |
|        | Compliant           | 66 | 4.47 | 1.59     |         |
| 41%    | Non-compliant       | 70 | 4.64 | 1.76     | 0.529   |
|        | Compliant           | 66 | 4.82 | 1.71     |         |
| MV2    | Non-compliant       | 70 | 5.65 | 1.56     | 0.982   |
|        | Compliant           | 66 | 5.66 | 1.56     |         |
| MV3    | Non-compliant       | 70 | 4.61 | 1.56     | 0.733   |
|        | Compliant           | 66 | 4.71 | 1.57     |         |

\*N= 136 for all methods except SUV2.5. In two scans SUV2.5 method identified a small MTV value where the other methods had a MTV value of 0. A value of 0 cannot be natural log-transformed

Table 2C: Comparison of volumes (using transformed data) between patient outcome: with and without progression

|        | Outcome        | N* | Mean | Std.Dev. | P-value |
|--------|----------------|----|------|----------|---------|
| SUV2.5 | No progression | 69 | 6.11 | 1.46     | 0.003   |
|        | Progression    | 69 | 6.79 | 1.13     |         |
| SUV4.0 | No progression | 67 | 5.23 | 1.64     | 0.013   |
|        | Progression    | 69 | 5.88 | 1.36     |         |
| A50P   | No progression | 67 | 4.16 | 1.57     | 0.014   |
|        | Progression    | 69 | 4.84 | 1.60     |         |
| 41%    | No progression | 67 | 4.37 | 1.83     | 0.018   |
|        | Progression    | 69 | 5.07 | 1.56     |         |
| MV2    | No progression | 67 | 5.26 | 1.67     | 0.003   |
|        | Progression    | 69 | 6.04 | 1.34     |         |
| MV3    | No progression | 67 | 4.35 | 1.68     | 0.021   |
|        | Progression    | 69 | 4.96 | 1.37     |         |

\*N= 136 for all methods except SUV2.5. In two scans SUV2.5 method identified a small MTV value where the other methods had a MTV value of 0. A value of 0 cannot be natural log-transformed.
